# Supplementary material
Source: Springer Nature journal article supplement (https://www.springermedizin.de/resource/supplementary/13024_2011_182_MOESM2_ESM.pdf/9643604)
Supplement: MOESM2 [file 9643604]

EC

TM

IC

A $\beta$

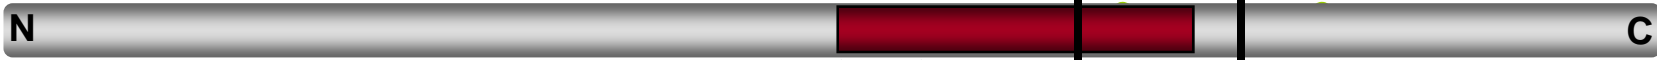

$\beta$ -secretase

$\alpha$ -secretase

APPs $\beta$

APPs $\alpha$

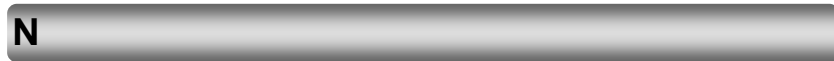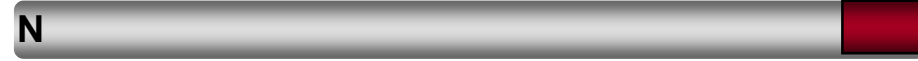

APP-CTF $\beta$

APP-CTF $\alpha$

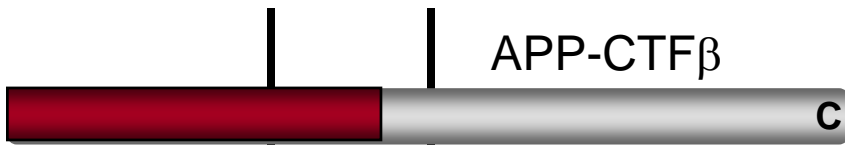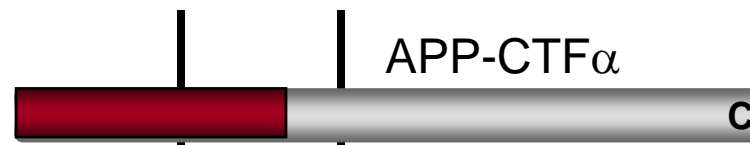

$\gamma$

$\gamma$ -secretase

$\gamma$

$\gamma$ -secretase

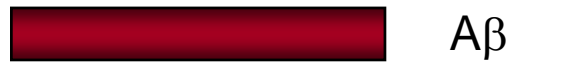

A $\beta$

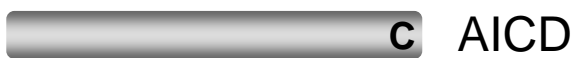

AICD

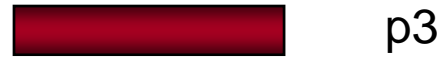

p3

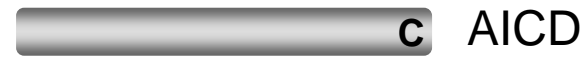

AICD
